# Supplementary material for: Narrow emission band ultraviolet/deep-blue thermally activated delayed fluorescence emitters modified with carbazole/carboline as a donor
Source: Royal Society of Chemistry journal article supplement (doi:10.1039/d4tc03503h), 2024-01-01
Supplement: d4tc03503h1.pdf [file d4tc03503h1.pdf]

## Supporting Information

### **Narrow Emission band Ultraviolet/Deep-blue Thermally Activated Delayed Fluorescence Emitters Modified with Carbazole/Carboline as Donors**

*Pengcheng Jin,<sup>a</sup> Xilin Yang,<sup>b</sup> Wen-Tao Su,<sup>a</sup> Shu-Hang Zhan,<sup>a</sup> Xiliang Chen,<sup>a</sup>  
Huaming Sun,<sup>c</sup> Ben Yang,<sup>a</sup> Shi-Jian Su<sup>\*,b</sup> and Jian-Yong Hu<sup>\*,a</sup>*

*<sup>a</sup>Key Laboratory of Applied Surface and Colloid Chemistry, National Ministry of Education; Shaanxi Key Laboratory for Advanced Energy Devices; Shaanxi Engineering Lab for Advanced Energy Technology, School of Materials Science and Engineering, Shaanxi Normal University, Xi'an 710119, China*

*<sup>b</sup>State Key Laboratory of Luminescent Materials and Devices and Institute of Polymer Optoelectronic Materials and Devices, South China University of Technology, Wushan Road 381, Guangzhou 510640, PR China*

*<sup>c</sup>National Demonstration Center for Experimental Chemistry Education, School of Chemistry and Chemical Engineering, Shaanxi Normal University, Xi'an 710119, China*

Corresponding

E-mail: [mssjsu@scut.edu.cn](mailto:mssjsu@scut.edu.cn); [hujianyong@snnu.edu.cn](mailto:hujianyong@snnu.edu.cn)

## Table of Contents

|                                                 |    |
|-------------------------------------------------|----|
| <b>1. General methods</b> .....                 | 1  |
| <b>2. Device fabrication</b> .....              | 2  |
| <b>3. Synthesis and characterizations</b> ..... | 3  |
| <b>4. Thermal properties</b> .....              | 5  |
| <b>5. X-Ray Crystallography</b> .....           | 6  |
| <b>6. Theoretical calculations</b> .....        | 7  |
| <b>7. Photophysical Properties</b> .....        | 20 |
| <b>8. Transient EL decay</b> .....              | 23 |
| <b>9. Electrochemical properties</b> .....      | 24 |
| <b>10. Device performance</b> .....             | 24 |
| <b>11. NMR spectra and Mass Spectra</b> .....   | 25 |
| <b>12. References</b> .....                     | 28 |

## 1. General methods

$^1\text{H}/^{13}\text{C}$  NMR spectra (400 MHz) were recorded by a JEOL 400 MHz FT-400 NMR spectrometer referenced to 7.26 and 77.0 ppm for chloroform-D solvent with  $\text{SiMe}_4$  as an internal reference:  $J$ -values are given in Hz. Mass spectra were obtained with a Bruker Microflex mass spectrometer in MALDI-TOF mode. Thermogravimetric analysis (TGA) was performed using a USA Waters Q600 under a nitrogen atmosphere at a heating rate of  $10\text{ }^\circ\text{C min}^{-1}$ . UV-vis absorption spectra were measured on a Shimadzu UV3600. Photoluminescence spectra were recorded on a PerkinElmer FL 8500 spectrofluorometer. Fluorescence quantum yields were measured using absolute methods with a Japan Hamamatsu C9920-06G. The frontier orbitals of the molecules based on the ground state geometries were calculated at B3LYP/6-31G\* by Gaussian 16 program.<sup>S1</sup> Cyclic voltammograms were measured on a CHI 610E A14297 in a solution of *tetra-n*-butylammonium hexafluorophosphate ( $\text{Bu}_4\text{NPF}_6$ ) (0.1 M) in a typical three-electrode cell with a platinum sheet working electrode, a platinum wire counter electrode, and a silver/Silver chloride ( $\text{Ag}/\text{Ag}^+$ ) reference electrode in dichloromethane at a scan rate of  $100\text{ mV s}^{-1}$  at room temperature under  $\text{N}_2$  atmosphere. X-ray diffraction patterns were collected using an X-ray diffractometer from Rigaku Japan. The data collection from a single crystal was conducted using a Bruker D8 venture diffractometer, equipped with graphite-monochromated Cu K  $\alpha$  radiation ( $\lambda = 1.54178\text{ \AA}$ ). Photoluminescence spectra were recorded on a PerkinElmer FL 8500 spectrofluorometer. Phosphorescence spectrum and transient PL curves were recorded on a horiba Fluorolog-QM and excited with a 365nm laser light source

**Estimation of the rate constant for RISC.** Rate constants ( $k_{\text{F}}$ ,  $k_{\text{IC}}$ ,  $k_{\text{ISC}}$ , and  $k_{\text{RISC}}$ ) were determined from the measurements of quantum yields ( $\Phi_{\text{F}}$  and  $\Phi_{\text{TADF}}$ ) and lifetimes ( $\tau_{\text{p}}$ ,  $\tau_{\text{d}}$ ) and of the prompt (fluorescence) and delayed (TADF) components according to Adachi's method.<sup>S2</sup>

$$K_{\text{p}} = 1 / \tau_{\text{p}}$$

$$K_d = 1 / \tau_d$$

$$K_F = \Phi_F / \tau_p$$

$$\Phi = K_F / (K_F + K_{IC})$$

$$\Phi_F = K_F / (K_F + K_{IC} + K_{ISC})$$

$$K_{RISC} = K_p K_d / (K_p - K_{ISC})$$

## 2. Device fabrication

The multilayer OLEDs were fabricated by the vacuum-deposition method.<sup>S3-4</sup> Electronic grade HAT-CN, TCTA, TAPC, TPBi, CBP, LiF, and Al were obtained from commercial sources. **TDBA-Cz**, **TDBA- $\alpha$ -Cb**, **TDBA- $\beta$ -Cb** and, **TDBA- $\gamma$ -Cb** were purified by vacuum sublimation. Soak the glass coated with ITO in an ultrasonic cleaning agent for 30 minutes, sonicate with deionized water, acetone, and isopropanol solvents for 10 minutes each, and then dry. The cleaned ITO glass is treated with perfluoromethane (CF<sub>4</sub>) plasma and then transferred to the evaporation chamber. In a high vacuum environment ( $1 \times 10^{-5}$  Pa), the functional layer materials, luminescent materials, and cathode materials (Al) are sequentially deposited at high temperatures. When evaporating and depositing organic material thin films, the evaporation rate is controlled at 1-2 Å s<sup>-1</sup>; When evaporating LiF, the evaporation rate is controlled at 0.1 Å s<sup>-1</sup>; When evaporating Al, the evaporation rate is controlled at 2 Å s<sup>-1</sup> and 9 mm<sup>2</sup> of the luminescent area. All the OLEDs were measured without encapsulation at room temperature in the dark. The Current density-Voltage-Luminance (*J-V-L*) characteristics were measured with a Keithley 2400 source meter and a LS110 luminance meter. The electroluminescence (EL) spectra were collected using a spectrascan PR650 spectrophotometer. The EQEs were calculated from the Luminance-Current density characteristics and EL spectra with the hypothesis of Lambertian distribution.

### 3. Synthesis and characterizations

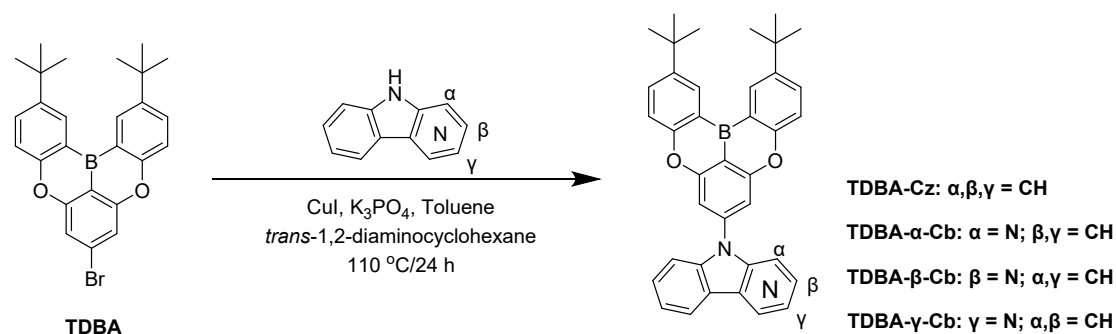

**Scheme S1.** Synthetic route for compounds **TDBA-Cz**, **TDBA- $\alpha$ -Cb**, **TDBA- $\beta$ -Cb**, and **TDBA- $\gamma$ -Cb**.

**TDBA** and **TDBA-Cz** were synthesized and characterized according to literature reported procedure.<sup>S5-6</sup>

#### **Synthesis of 9-(2,12-di-tert-butyl-5,9-dioxo-13b-boranaphtho[3,2,1-de]anthracen-7-yl)-9H-pyrido[2,3-b]indole (TDBA- $\alpha$ -Cb):**

7-bromo-2,12-di-tert-butyl-5,9-dioxo-13b-boranaphtho[3,2,1-de]anthracene (**TDBA**) (0.92 g, 2.0 mmol), 9H-Pyrido[2,3-b]indole ( **$\alpha$ -Cb**) (0.67 g, 4.0 mmol), CuI (0.19 g, 1.0 mmol), K<sub>3</sub>PO<sub>4</sub> (2.12 g, 10.0 mmol), and trans-1,2-diaminocyclohexane (1.20 mL, 10.0 mmol) were mixed in toluene (40 mL) with a flask containing nitrogen. The reaction mixture was stirred at 110 °C for 24 h under nitrogen. After it was cooled to room temperature, the reaction mixture was quenched with brine and extracted with CH<sub>2</sub>Cl<sub>2</sub>. The combined organic extracts were dried with anhydrous Na<sub>2</sub>SO<sub>4</sub> and evaporated. The crude product was successfully purified by column chromatography using hexane: dichloromethane (2:1) as the eluent to give **TDBA- $\alpha$ -Cb** as white solid. Yield: 35% (0.38 g). <sup>1</sup>H NMR (400 MHz, CDCl<sub>3</sub>):  $\delta$  = 8.80 (d,  $J$  = 2.40 Hz, 2H), 8.56-8.55 (dd,  $J$  = 1.60 Hz, 1H), 8.44-8.42 (dd,  $J$  = 1.60 Hz, 1H), 8.18-8.16 (d,  $J$  = 8.00 Hz, 1H), 7.81-7.78 (m, 3H), 7.60 (s, 3H), 7.53-7.51 (d,  $J$  = 8.80 Hz, 3H), 7.41-7.37 (t, <sup>1</sup> $J$  = 8.00 Hz, <sup>2</sup> $J$  = 7.20 Hz, 1H), 1.51 (s, 18H) ppm. <sup>13</sup>C NMR (100 MHz,

CDCl<sub>3</sub>):  $\delta$  = 158.92, 158.40, 151.84, 146.64, 145.30, 141.87, 139.73, 131.72, 130.42, 128.55, 127.35, 121.89, 121.38, 121.15, 118.16, 116.94, 116.75, 111.05, 107.17, 107.12, 34.72, 31.73. EI-MS (m/z): calcd for C<sub>37</sub>H<sub>33</sub>BN<sub>2</sub>O<sub>2</sub>, 548.2635; found, 548.2781 [M<sup>+</sup>].

**Synthesis of 9-(2,12-di-tert-butyl-5,9-dioxa-13b-boranaphtho[3,2,1-de]anthracen-7-yl)-9H-pyrido[3,4-b]indole (TDBA- $\beta$ -Cb):**

Compound **TDBA- $\beta$ -Cb** was synthesized according to the same procedure described above for the synthesis of **TDBA- $\alpha$ -Cb**. **TDBA** (0.92 g, 2.0 mmol), 9H-Pyrido[3,4-b]indole ( **$\beta$ -Cb**) (0.67 g, 4.0 mmol), CuI (0.19 g, 1.0 mmol), K<sub>3</sub>PO<sub>4</sub> (2.12 g, 10.0 mmol), trans-1,2-diaminocyclohexane (1.20 mL, 10.0 mmol), and to give **TDBA- $\beta$ -Cb** as white solid. Yield: 36% (0.40 g). EI-MS (m/z): calcd for C<sub>37</sub>H<sub>33</sub>BN<sub>2</sub>O<sub>2</sub>, 548.2635; found, 548.8635 [M<sup>+</sup>].

**Synthesis of 5-(2,12-di-tert-butyl-5,9-dioxa-13b-boranaphtho[3,2,1-de]anthracen-7-yl)-5H-pyrido[4,3-b]indole (TDBA- $\gamma$ -Cb):**

Compound **TDBA- $\gamma$ -Cb** was synthesized according to the same procedure described above for the synthesis of **TDBA- $\alpha$ -Cb**. **TDBA** (92 mg, 0.20 mmol), 5H-pyrido[4,3-b]indole ( **$\gamma$ -Cb**) (67.2 mg, 0.40 mmol), CuI (19 mg, 0.10 mmol), K<sub>3</sub>PO<sub>4</sub> (212 mg, 1.0 mmol), trans-1,2-diaminocyclohexane (0.12 mL, 1.0 mmol), and to give **TDBA- $\gamma$ -Cb** as white solid. Yield: 18% (20.0 mg). EI-MS (m/z): calcd for C<sub>37</sub>H<sub>33</sub>BN<sub>2</sub>O<sub>2</sub>, 548.2635; found, 548.8709 [M<sup>+</sup>].

#### 4. Thermal properties

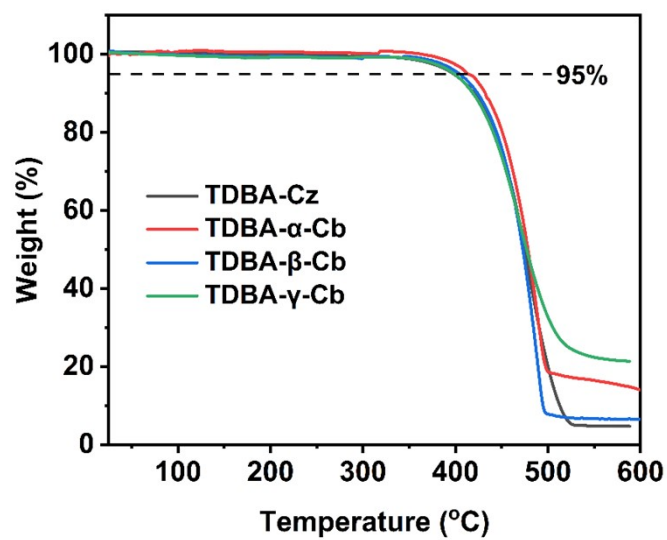

**Figure S1.** Thermal gravimetric analysis (TGA) of TDBA-Cz, TDBA- $\alpha$ -Cb, TDBA- $\beta$ -Cb and TDBA- $\gamma$ -Cb.

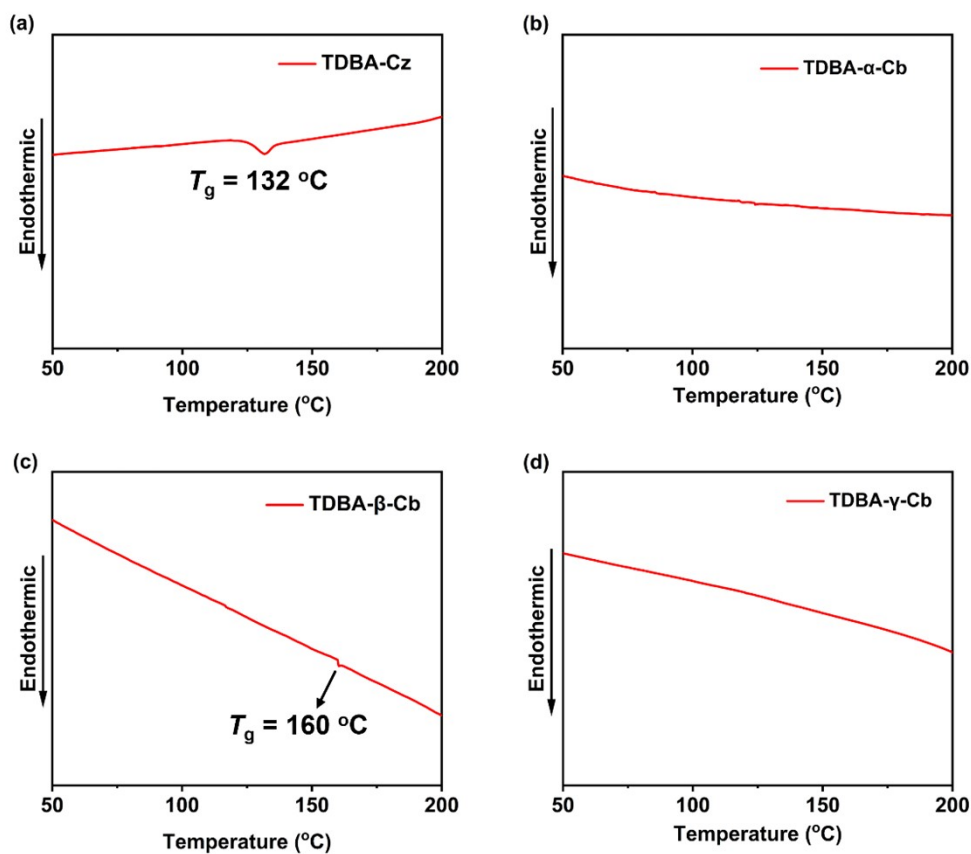

**Figure S2.** Differential scanning calorimetry (DSC) of TDDBA-Cz, TDDBA- $\alpha$ -Cb, TDDBA- $\beta$ -Cb and TDDBA- $\gamma$ -Cb.

## 5. X-Ray Crystallography

**Table S1.** Crystal data and structure refinement for TDDBA- $\alpha$ -Cb.

| Parameters        | TDDBA- $\alpha$ -Cb                                            |
|-------------------|----------------------------------------------------------------|
| CCDC number       | 2361056                                                        |
| Empirical formula | C <sub>37</sub> H <sub>33</sub> BN <sub>2</sub> O <sub>2</sub> |
| Formula weight    | 548.46                                                         |
| Temperature/K     | 200.00                                                         |
| Crystal system    | triclinic                                                      |
| Space group       | P-1                                                            |
| a/Å               | 8.6753(7)                                                      |
| b/Å               | 13.0352(11)                                                    |
| c/Å               | 13.1745(11)                                                    |
| $\alpha$ /°       | 81.753(4)                                                      |
| $\beta$ /°        | 85.685(4)                                                      |
| $\gamma$ /°       | 82.633(4)                                                      |



|                                             |                                                                  |
|---------------------------------------------|------------------------------------------------------------------|
| Volume/Å <sup>3</sup>                       | 1459.8(2)                                                        |
| Z                                           | 2                                                                |
| $\rho_{\text{calc}}/\text{cm}^3$            | 1.248                                                            |
| $\mu/\text{mm}^{-1}$                        | 0.595                                                            |
| F(000)                                      | 580.0                                                            |
| Crystal size/mm <sup>3</sup>                | 0.3 × 0.2 × 0.1                                                  |
| Radiation                                   | CuK $\alpha$ ( $\lambda = 1.54178$ )                             |
| 2 $\Theta$ range for data collection/°      | 6.79 to 138.264                                                  |
| Index ranges                                | -10 ≤ h ≤ 10, -15 ≤ k ≤ 15, -15 ≤ l ≤ 15                         |
| Reflections collected                       | 28126                                                            |
| Independent reflections                     | 5288 [ $R_{\text{int}} = 0.0551$ , $R_{\text{sigma}} = 0.0380$ ] |
| Data/restraints/parameters                  | 5288/0/385                                                       |
| Goodness-of-fit on F <sup>2</sup>           | 1.771                                                            |
| Final R indexes [ $I \geq 2\sigma(I)$ ]     | $R_1 = 0.1217$ , $wR_2 = 0.3794$                                 |
| Final R indexes [all data]                  | $R_1 = 0.1293$ , $wR_2 = 0.3885$                                 |
| Largest diff. peak/hole / e Å <sup>-3</sup> | 0.57/-0.47                                                       |

---

## 6. Theoretical calculations

Symbolic Z-matrix: **TDBA-Cz**

Charge = 0 Multiplicity = 1

|   |          |          |          |
|---|----------|----------|----------|
| C | 2.24277  | -1.25282 | 0.07514  |
| C | 0.85114  | -1.21568 | 0.06679  |
| C | 0.11904  | -0.01526 | 0.011    |
| C | 0.86787  | 1.17341  | -0.05051 |
| C | 2.26012  | 1.18493  | -0.05572 |
| C | 2.93848  | -0.04001 | 0.01468  |
| C | -1.117   | 2.50556  | -0.20487 |
| C | -2.01355 | 1.41253  | -0.16711 |
| C | -3.38038 | 1.7377   | -0.31334 |
| H | -4.09127 | 0.92024  | -0.32726 |
| C | -3.8696  | 3.03744  | -0.46056 |
| C | -2.9223  | 4.07838  | -0.46321 |
| C | -1.56374 | 3.82174  | -0.34153 |
| H | 2.7665   | -2.19802 | 0.11528  |
| H | 2.79625  | 2.12189  | -0.14296 |

|   |          |          |          |
|---|----------|----------|----------|
| H | -3.24095 | 5.10929  | -0.57048 |
| H | -0.83465 | 4.62577  | -0.3588  |
| C | -2.03561 | -1.40994 | 0.17684  |
| C | -1.15525 | -2.51646 | 0.20958  |
| H | -4.1062  | -0.8872  | 0.33705  |
| C | -3.40755 | -1.71514 | 0.31949  |
| C | -1.62241 | -3.82666 | 0.33724  |
| C | -2.98472 | -4.06328 | 0.45565  |
| C | -3.91639 | -3.00808 | 0.45845  |
| H | -0.90544 | -4.64155 | 0.34929  |
| H | -3.31912 | -5.08993 | 0.55563  |
| B | -1.40212 | -0.00356 | 0.00777  |
| O | 0.21341  | -2.41869 | 0.12526  |
| O | 0.25067  | 2.38709  | -0.11688 |
| C | -5.4334  | -3.2332  | 0.60842  |
| C | -5.94367 | -2.49935 | 1.87128  |
| C | -6.16504 | -2.67845 | -0.63692 |
| C | -5.79143 | -4.72559 | 0.7461   |
| H | -5.44802 | -2.87849 | 2.77221  |
| H | -5.75964 | -1.42094 | 1.81932  |
| H | -7.02422 | -2.64735 | 1.98918  |
| H | -5.82915 | -3.18655 | -1.54802 |
| H | -7.24775 | -2.8277  | -0.54296 |
| H | -5.98773 | -1.60581 | -0.76967 |
| H | -6.87673 | -4.83661 | 0.84888  |
| H | -5.48347 | -5.30273 | -0.13338 |
| H | -5.32914 | -5.17689 | 1.63152  |
| C | -5.38285 | 3.2842   | -0.61431 |
| C | -5.90175 | 2.55071  | -1.87386 |
| C | -6.12464 | 2.74748  | 0.6329   |
| C | -5.71843 | 4.78093  | -0.76112 |
| H | -5.39877 | 2.91703  | -2.77602 |
| H | -5.73407 | 1.46999  | -1.81528 |
| H | -6.97972 | 2.71429  | -1.99468 |
| H | -5.78318 | 3.25612  | 1.54166  |
| H | -7.20489 | 2.91185  | 0.53597  |
| H | -5.9632  | 1.67319  | 0.77232  |
| H | -6.80183 | 4.90747  | -0.86588 |
| H | -5.40293 | 5.3586   | 0.11537  |
| H | -5.24854 | 5.2201   | -1.64863 |
| C | 5.18927  | 0.78521  | 0.79037  |
| C | 5.17573  | -0.84733 | -0.7821  |
| C | 4.85051  | 1.71453  | 1.7781   |
| C | 6.5456   | 0.51995  | 0.4655   |

|   |         |          |          |
|---|---------|----------|----------|
| C | 6.5358  | -0.51747 | -0.53972 |
| C | 5.88644 | 2.39366  | 2.41614  |
| H | 3.81688 | 1.8977   | 2.04859  |
| C | 7.56743 | 1.21675  | 1.12044  |
| C | 5.68582 | -2.40107 | -2.32958 |
| C | 7.50039 | -1.21067 | -1.27003 |
| C | 7.23235 | 2.15597  | 2.09048  |
| H | 5.64306 | 3.12082  | 3.18593  |
| H | 8.60848 | 1.02041  | 0.87771  |
| C | 7.0606  | -2.17111 | -2.18114 |
| H | 5.33236 | -3.14996 | -3.03569 |
| H | 8.5602  | -1.00963 | -1.1367  |
| H | 8.01522 | 2.70498  | 2.60564  |
| H | 7.76864 | -2.74053 | -2.77489 |
| N | 4.35812 | -0.04608 | 0.02249  |
| C | 4.73236 | -1.75438 | -1.64497 |
| H | 3.83016 | -1.83561 | -2.29875 |

Symbolic Z-matrix: **TDBA- $\alpha$ -Cb**

Charge = 0 Multiplicity = 1

|   |          |          |          |
|---|----------|----------|----------|
| C | 2.24277  | -1.25282 | 0.07514  |
| C | 0.85114  | -1.21568 | 0.06679  |
| C | 0.11904  | -0.01526 | 0.011    |
| C | 0.86787  | 1.17341  | -0.05051 |
| C | 2.26012  | 1.18493  | -0.05572 |
| C | 2.93848  | -0.04001 | 0.01468  |
| C | -1.117   | 2.50556  | -0.20487 |
| C | -2.01355 | 1.41253  | -0.16711 |
| C | -3.38038 | 1.7377   | -0.31334 |
| H | -4.09127 | 0.92024  | -0.32726 |
| C | -3.8696  | 3.03744  | -0.46056 |
| C | -2.9223  | 4.07838  | -0.46321 |
| C | -1.56374 | 3.82174  | -0.34153 |
| H | 2.7665   | -2.19802 | 0.11528  |
| H | 2.79625  | 2.12189  | -0.14296 |
| H | -3.24095 | 5.10929  | -0.57048 |
| H | -0.83465 | 4.62577  | -0.3588  |
| C | -2.03561 | -1.40994 | 0.17684  |
| C | -1.15525 | -2.51646 | 0.20958  |
| H | -4.1062  | -0.8872  | 0.33705  |
| C | -3.40755 | -1.71514 | 0.31949  |
| C | -1.62241 | -3.82666 | 0.33724  |
| C | -2.98472 | -4.06328 | 0.45565  |
| C | -3.91639 | -3.00808 | 0.45845  |

|   |          |          |          |
|---|----------|----------|----------|
| H | -0.90544 | -4.64155 | 0.34929  |
| H | -3.31912 | -5.08993 | 0.55563  |
| B | -1.40212 | -0.00356 | 0.00777  |
| O | 0.21341  | -2.41869 | 0.12526  |
| O | 0.25067  | 2.38709  | -0.11688 |
| C | -5.4334  | -3.2332  | 0.60842  |
| C | -5.94367 | -2.49935 | 1.87128  |
| C | -6.16504 | -2.67845 | -0.63692 |
| C | -5.79143 | -4.72559 | 0.7461   |
| H | -5.44802 | -2.87849 | 2.77221  |
| H | -5.75964 | -1.42094 | 1.81932  |
| H | -7.02422 | -2.64735 | 1.98918  |
| H | -5.82915 | -3.18655 | -1.54802 |
| H | -7.24775 | -2.8277  | -0.54296 |
| H | -5.98773 | -1.60581 | -0.76967 |
| H | -6.87673 | -4.83661 | 0.84888  |
| H | -5.48347 | -5.30273 | -0.13338 |
| H | -5.32914 | -5.17689 | 1.63152  |
| C | -5.38285 | 3.2842   | -0.61431 |
| C | -5.90175 | 2.55071  | -1.87386 |
| C | -6.12464 | 2.74748  | 0.6329   |
| C | -5.71843 | 4.78093  | -0.76112 |
| H | -5.39877 | 2.91703  | -2.77602 |
| H | -5.73407 | 1.46999  | -1.81528 |
| H | -6.97972 | 2.71429  | -1.99468 |
| H | -5.78318 | 3.25612  | 1.54166  |
| H | -7.20489 | 2.91185  | 0.53597  |
| H | -5.9632  | 1.67319  | 0.77232  |
| H | -6.80183 | 4.90747  | -0.86588 |
| H | -5.40293 | 5.3586   | 0.11537  |
| H | -5.24854 | 5.2201   | -1.64863 |
| C | 5.18927  | 0.78521  | 0.79037  |
| C | 5.17573  | -0.84733 | -0.7821  |
| C | 4.85051  | 1.71453  | 1.7781   |
| C | 6.5456   | 0.51995  | 0.4655   |
| C | 6.5358   | -0.51747 | -0.53972 |
| C | 5.88644  | 2.39366  | 2.41614  |
| H | 3.81688  | 1.8977   | 2.04859  |
| C | 7.56743  | 1.21675  | 1.12044  |
| C | 5.68582  | -2.40107 | -2.32958 |
| C | 7.50039  | -1.21067 | -1.27003 |
| C | 7.23235  | 2.15597  | 2.09048  |
| H | 5.64306  | 3.12082  | 3.18593  |
| H | 8.60848  | 1.02041  | 0.87771  |

|   |         |          |          |
|---|---------|----------|----------|
| C | 7.0606  | -2.17111 | -2.18114 |
| H | 5.33221 | -3.14718 | -3.03854 |
| H | 8.5602  | -1.00963 | -1.1367  |
| H | 8.01522 | 2.70498  | 2.60564  |
| H | 7.76864 | -2.74053 | -2.77489 |
| N | 4.35812 | -0.04608 | 0.02249  |
| N | 4.73236 | -1.75438 | -1.64497 |

Symbolic Z-matrix: **TDBA- $\beta$ -Cb**

Charge = 0 Multiplicity = 1

|   |          |          |          |
|---|----------|----------|----------|
| C | 2.24277  | -1.25282 | 0.07514  |
| C | 0.85114  | -1.21568 | 0.06679  |
| C | 0.11904  | -0.01526 | 0.011    |
| C | 0.86787  | 1.17341  | -0.05051 |
| C | 2.26012  | 1.18493  | -0.05572 |
| C | 2.93848  | -0.04001 | 0.01468  |
| C | -1.117   | 2.50556  | -0.20487 |
| C | -2.01355 | 1.41253  | -0.16711 |
| C | -3.38038 | 1.7377   | -0.31334 |
| H | -4.09127 | 0.92024  | -0.32726 |
| C | -3.8696  | 3.03744  | -0.46056 |
| C | -2.9223  | 4.07838  | -0.46321 |
| C | -1.56374 | 3.82174  | -0.34153 |
| H | 2.7665   | -2.19802 | 0.11528  |
| H | 2.79625  | 2.12189  | -0.14296 |
| H | -3.24095 | 5.10929  | -0.57048 |
| H | -0.83465 | 4.62577  | -0.3588  |
| C | -2.03561 | -1.40994 | 0.17684  |
| C | -1.15525 | -2.51646 | 0.20958  |
| H | -4.1062  | -0.8872  | 0.33705  |
| C | -3.40755 | -1.71514 | 0.31949  |
| C | -1.62241 | -3.82666 | 0.33724  |
| C | -2.98472 | -4.06328 | 0.45565  |
| C | -3.91639 | -3.00808 | 0.45845  |
| H | -0.90544 | -4.64155 | 0.34929  |
| H | -3.31912 | -5.08993 | 0.55563  |
| B | -1.40212 | -0.00356 | 0.00777  |
| O | 0.21341  | -2.41869 | 0.12526  |
| O | 0.25067  | 2.38709  | -0.11688 |
| C | -5.4334  | -3.2332  | 0.60842  |
| C | -5.94367 | -2.49935 | 1.87128  |
| C | -6.16504 | -2.67845 | -0.63692 |
| C | -5.79143 | -4.72559 | 0.7461   |
| H | -5.44802 | -2.87849 | 2.77221  |

|   |          |          |          |
|---|----------|----------|----------|
| H | -5.75964 | -1.42094 | 1.81932  |
| H | -7.02422 | -2.64735 | 1.98918  |
| H | -5.82915 | -3.18655 | -1.54802 |
| H | -7.24775 | -2.8277  | -0.54296 |
| H | -5.98773 | -1.60581 | -0.76967 |
| H | -6.87673 | -4.83661 | 0.84888  |
| H | -5.48347 | -5.30273 | -0.13338 |
| H | -5.32914 | -5.17689 | 1.63152  |
| C | -5.38285 | 3.2842   | -0.61431 |
| C | -5.90175 | 2.55071  | -1.87386 |
| C | -6.12464 | 2.74748  | 0.6329   |
| C | -5.71843 | 4.78093  | -0.76112 |
| H | -5.39877 | 2.91703  | -2.77602 |
| H | -5.73407 | 1.46999  | -1.81528 |
| H | -6.97972 | 2.71429  | -1.99468 |
| H | -5.78318 | 3.25612  | 1.54166  |
| H | -7.20489 | 2.91185  | 0.53597  |
| H | -5.9632  | 1.67319  | 0.77232  |
| H | -6.80183 | 4.90747  | -0.86588 |
| H | -5.40293 | 5.3586   | 0.11537  |
| H | -5.24854 | 5.2201   | -1.64863 |
| C | 5.18927  | 0.78521  | 0.79037  |
| C | 5.17573  | -0.84733 | -0.7821  |
| C | 4.85051  | 1.71453  | 1.7781   |
| C | 6.5456   | 0.51995  | 0.4655   |
| C | 6.5358   | -0.51747 | -0.53972 |
| C | 5.88644  | 2.39366  | 2.41614  |
| H | 3.81688  | 1.8977   | 2.04859  |
| C | 7.56743  | 1.21675  | 1.12044  |
| C | 7.50039  | -1.21067 | -1.27003 |
| C | 7.23235  | 2.15597  | 2.09048  |
| H | 5.64306  | 3.12082  | 3.18593  |
| H | 8.60848  | 1.02041  | 0.87771  |
| C | 7.0606   | -2.17111 | -2.18114 |
| H | 8.5602   | -1.00963 | -1.1367  |
| H | 8.01522  | 2.70498  | 2.60564  |
| H | 7.76864  | -2.74053 | -2.77489 |
| N | 4.35812  | -0.04608 | 0.02249  |
| C | 4.73236  | -1.75438 | -1.64497 |
| H | 3.83016  | -1.83561 | -2.29875 |
| N | 5.68582  | -2.40107 | -2.32958 |

Symbolic Z-matrix: **TDBA- $\gamma$ -Cb**

Charge = 0 Multiplicity = 1

|   |          |          |          |
|---|----------|----------|----------|
| C | 2.24277  | -1.25282 | 0.07514  |
| C | 0.85114  | -1.21568 | 0.06679  |
| C | 0.11904  | -0.01526 | 0.011    |
| C | 0.86787  | 1.17341  | -0.05051 |
| C | 2.26012  | 1.18493  | -0.05572 |
| C | 2.93848  | -0.04001 | 0.01468  |
| C | -1.117   | 2.50556  | -0.20487 |
| C | -2.01355 | 1.41253  | -0.16711 |
| C | -3.38038 | 1.7377   | -0.31334 |
| H | -4.09127 | 0.92024  | -0.32726 |
| C | -3.8696  | 3.03744  | -0.46056 |
| C | -2.9223  | 4.07838  | -0.46321 |
| C | -1.56374 | 3.82174  | -0.34153 |
| H | 2.7665   | -2.19802 | 0.11528  |
| H | 2.79625  | 2.12189  | -0.14296 |
| H | -3.24095 | 5.10929  | -0.57048 |
| H | -0.83465 | 4.62577  | -0.3588  |
| C | -2.03561 | -1.40994 | 0.17684  |
| C | -1.15525 | -2.51646 | 0.20958  |
| H | -4.1062  | -0.8872  | 0.33705  |
| C | -3.40755 | -1.71514 | 0.31949  |
| C | -1.62241 | -3.82666 | 0.33724  |
| C | -2.98472 | -4.06328 | 0.45565  |
| C | -3.91639 | -3.00808 | 0.45845  |
| H | -0.90544 | -4.64155 | 0.34929  |
| H | -3.31912 | -5.08993 | 0.55563  |
| B | -1.40212 | -0.00356 | 0.00777  |
| O | 0.21341  | -2.41869 | 0.12526  |
| O | 0.25067  | 2.38709  | -0.11688 |
| C | -5.4334  | -3.2332  | 0.60842  |
| C | -5.94367 | -2.49935 | 1.87128  |
| C | -6.16504 | -2.67845 | -0.63692 |
| C | -5.79143 | -4.72559 | 0.7461   |
| H | -5.44802 | -2.87849 | 2.77221  |
| H | -5.75964 | -1.42094 | 1.81932  |
| H | -7.02422 | -2.64735 | 1.98918  |
| H | -5.82915 | -3.18655 | -1.54802 |
| H | -7.24775 | -2.8277  | -0.54296 |
| H | -5.98773 | -1.60581 | -0.76967 |
| H | -6.87673 | -4.83661 | 0.84888  |
| H | -5.48347 | -5.30273 | -0.13338 |
| H | -5.32914 | -5.17689 | 1.63152  |
| C | -5.38285 | 3.2842   | -0.61431 |
| C | -5.90175 | 2.55071  | -1.87386 |

|   |          |          |          |
|---|----------|----------|----------|
| C | -6.12464 | 2.74748  | 0.6329   |
| C | -5.71843 | 4.78093  | -0.76112 |
| H | -5.39877 | 2.91703  | -2.77602 |
| H | -5.73407 | 1.46999  | -1.81528 |
| H | -6.97972 | 2.71429  | -1.99468 |
| H | -5.78318 | 3.25612  | 1.54166  |
| H | -7.20489 | 2.91185  | 0.53597  |
| H | -5.9632  | 1.67319  | 0.77232  |
| H | -6.80183 | 4.90747  | -0.86588 |
| H | -5.40293 | 5.3586   | 0.11537  |
| H | -5.24854 | 5.2201   | -1.64863 |
| C | 5.18927  | 0.78521  | 0.79037  |
| C | 5.17573  | -0.84733 | -0.7821  |
| C | 4.85051  | 1.71453  | 1.7781   |
| C | 6.5456   | 0.51995  | 0.4655   |
| C | 6.5358   | -0.51747 | -0.53972 |
| C | 5.88644  | 2.39366  | 2.41614  |
| H | 3.81688  | 1.8977   | 2.04859  |
| C | 7.56743  | 1.21675  | 1.12044  |
| C | 5.68582  | -2.40107 | -2.32958 |
| C | 7.50039  | -1.21067 | -1.27003 |
| C | 7.23235  | 2.15597  | 2.09048  |
| H | 5.64306  | 3.12082  | 3.18593  |
| H | 8.60848  | 1.02041  | 0.87771  |
| H | 5.33221  | -3.14718 | -3.03854 |
| H | 8.5602   | -1.00963 | -1.1367  |
| H | 8.01522  | 2.70498  | 2.60564  |
| N | 4.35812  | -0.04608 | 0.02249  |
| C | 4.73236  | -1.75438 | -1.64497 |
| H | 3.67683  | -1.90507 | -1.73468 |
| N | 7.0606   | -2.17111 | -2.18114 |

**Table S2.** Calculated energy levels, oscillator strengths ( $f$ ), and orbital transition analyses for **TDBA-Cz**.

| Excited state | $E_g$ [eV] | $E_g$ [nm] | $f$    | Transition (D: donor unit, A: acceptor unit) |   |      | Coefficient |
|---------------|------------|------------|--------|----------------------------------------------|---|------|-------------|
|               |            |            |        |                                              | → |      |             |
| S1            | 3.1896     | 388.71     | 0.2243 | HOMO                                         | → | LUMO | 0.70285     |
| S2            | 3.3955     | 365.14     | 0.1275 | HOMO-1                                       | → | LUMO | 0.69646     |
| T1            | 2.8836     | 429.97     | 0.0000 | HOMO-1                                       | → | LUMO | 0.69505     |
| T2            | 2.9729     | 417.05     | 0.0000 | HOMO-6                                       | → | LUMO | 0.14534     |
|               |            |            |        | HOMO-3                                       | → | LUMO | 0.11366     |



|    |        |        |        |        |   |        |          |
|----|--------|--------|--------|--------|---|--------|----------|
|    |        |        |        | HOMO   | → | LUMO   | 0.64773  |
|    |        |        |        | HOMO   | → | LUMO+2 | 0.11648  |
| T3 | 3.1694 | 391.19 | 0.0000 | HOMO-8 | → | LUMO+9 | -0.13371 |
|    |        |        |        | HOMO-4 | → | LUMO+1 | -0.14568 |
|    |        |        |        | HOMO-4 | → | LUMO+8 | -0.10815 |
|    |        |        |        | HOMO-2 | → | LUMO   | -0.13769 |
|    |        |        |        | HOMO-2 | → | LUMO+1 | 0.58985  |
|    |        |        |        | HOMO   | → | LUMO+6 | -0.25141 |
| T4 | 3.3113 | 374.43 | 0.0000 | HOMO-5 | → | LUMO+4 | 0.15060  |
|    |        |        |        | HOMO-3 | → | LUMO   | 0.59346  |
|    |        |        |        | HOMO-3 | → | LUMO+5 | -0.14774 |
|    |        |        |        | HOMO-1 | → | LUMO+4 | 0.17725  |
|    |        |        |        | HOMO   | → | LUMO   | -0.15646 |
| T5 | 3.3941 | 365.29 | 0.0000 | HOMO-4 | → | LUMO+6 | 0.13228  |
|    |        |        |        | HOMO   | → | LUMO+6 | 0.66707  |

**Table S3.** Calculated energy levels, oscillator strengths ( $f$ ), and orbital transition analyses for **TDBA- $\alpha$ -Cb**.

| Excited state | $E_g$ [eV] | $E_g$ [nm] | $f$    | Transition (D: donor unit, A: acceptor unit) |   |        | Coefficient |
|---------------|------------|------------|--------|----------------------------------------------|---|--------|-------------|
| S1            | 3.3627     | 368.71     | 0.1242 | HOMO                                         | → | LUMO   | 0.69751     |
| S2            | 3.5419     | 350.05     | 0.2967 | HOMO                                         | → | LUMO   | 0.70078     |
| T1            | 2.8514     | 434.82     | 0.0000 | HOMO                                         | → | LUMO   | 0.69595     |
| T2            | 3.1239     | 396.90     | 0.0000 | HOMO-2                                       | → | LUMO+1 | 0.56655     |
|               |            |            |        | HOMO-1                                       | → | LUMO   | 0.11734     |
|               |            |            |        | HOMO-1                                       | → | LUMO+1 | 0.23155     |
|               |            |            |        | HOMO-1                                       | → | LUMO+4 | 0.19837     |
| T3            | 3.1611     | 392.21     | 0.0000 | HOMO-5                                       | → | LUMO   | -0.20254    |
|               |            |            |        | HOMO-3                                       | → | LUMO   | -0.29185    |

|    |        |        |        |        |   |        |          |
|----|--------|--------|--------|--------|---|--------|----------|
|    |        |        |        | HOMO-2 | → | LUMO+1 | -0.13871 |
|    |        |        |        | HOMO-1 | → | LUMO   | 0.49998  |
|    |        |        |        | HOMO-1 | → | LUMO+2 | 0.10711  |
|    |        |        |        | HOMO   | → | LUMO+3 | 0.13567  |
|    |        |        |        | HOMO   | → | LUMO+5 | 0.12794  |
| T4 | 3.3626 | 368.72 | 0.0000 | HOMO-3 | → | LUMO   | 0.49702  |
|    |        |        |        | HOMO-3 | → | LUMO+6 | -0.10610 |
|    |        |        |        | HOMO-2 | → | LUMO+1 | -0.11379 |
|    |        |        |        | HOMO-1 | → | LUMO   | 0.27294  |
|    |        |        |        | HOMO-1 | → | LUMO+1 | 0.27924  |
|    |        |        |        | HOMO   | → | LUMO+5 | -0.10981 |
| T5 | 3.3866 | 366.10 | 0.0000 | HOMO-3 | → | LUMO   | -0.24265 |
|    |        |        |        | HOMO-2 | → | LUMO+1 | -0.18405 |
|    |        |        |        | HOMO-1 | → | LUMO   | -0.16228 |
|    |        |        |        | HOMO-1 | → | LUMO+1 | 0.57208  |

**Table S4.** Calculated energy levels, oscillator strengths ( $f$ ), and orbital transition analyses for **TDBA- $\beta$ -Cb**.

| Excited state | $E_g$ [eV] | $E_g$ [nm] | $f$    | Transition (D: donor unit, A: acceptor unit) |   |        | Coefficient |
|---------------|------------|------------|--------|----------------------------------------------|---|--------|-------------|
|               |            |            |        |                                              | → |        |             |
| S1            | 3.3407     | 371.13     | 0.2448 | HOMO                                         | → | LUMO   | 0.70225     |
| S2            | 3.4009     | 364.57     | 0.1311 | HOMO-1                                       | → | LUMO   | 0.69705     |
| T1            | 2.8829     | 430.07     | 0.0000 | HOMO-1                                       | → | LUMO   | 0.69606     |
| T2            | 3.0822     | 402.26     | 0.0000 | HOMO-6                                       | → | LUMO   | 0.17713     |
|               |            |            |        | HOMO-3                                       | → | LUMO   | 0.18723     |
|               |            |            |        | HOMO-1                                       | → | LUMO+3 | -0.12119    |
|               |            |            |        | HOMO                                         | → | LUMO   | 0.60345     |
|               |            |            |        | HOMO                                         | → | LUMO+2 | 0.10250     |
| T3            | 3.1941     | 388.16     | 0.0000 | HOMO-2                                       | → | LUMO+1 | -0.25827    |

|    |        |        |        |        |   |        |          |
|----|--------|--------|--------|--------|---|--------|----------|
|    |        |        |        | HOMO   | → | LUMO+1 | 0.61464  |
|    |        |        |        | HOMO   | → | LUMO+5 | 0.11391  |
| T4 | 3.2713 | 379.01 | 0.0000 | HOMO-9 | → | LUMO+9 | -0.10241 |
|    |        |        |        | HOMO-7 | → | LUMO+1 | -0.15317 |
|    |        |        |        | HOMO-2 | → | LUMO+1 | 0.51283  |
|    |        |        |        | HOMO   | → | LUMO+1 | 0.29821  |
|    |        |        |        | HOMO   | → | LUMO+5 | -0.25666 |
| T5 | 3.3201 | 373.44 | 0.0000 | HOMO-5 | → | LUMO+4 | 0.14003  |
|    |        |        |        | HOMO-3 | → | LUMO   | 0.58851  |
|    |        |        |        | HOMO-3 | → | LUMO+6 | -0.13821 |
|    |        |        |        | HOMO-1 | → | LUMO+4 | 0.16117  |
|    |        |        |        | HOMO   | → | LUMO   | -0.23890 |

**Table S5.** Calculated energy levels, oscillator strengths ( $f$ ), and orbital transition analyses for **TDBA- $\gamma$ -Cb**.

| Excited state | $E_g$ [eV] | $E_g$ [nm] | $f$    | Transition (D: donor unit, A: acceptor unit) |   |        | Coefficient |
|---------------|------------|------------|--------|----------------------------------------------|---|--------|-------------|
|               |            |            |        |                                              | → |        |             |
| S1            | 3.3997     | 364.70     | 0.1968 | HOMO-1                                       | → | LUMO   | 0.42325     |
|               |            |            |        | HOMO                                         | → | LUMO   | 0.55676     |
| S2            | 3.4166     | 362.89     | 0.2037 | HOMO-1                                       | → | LUMO   | 0.55367     |
|               |            |            |        | HOMO                                         | → | LUMO   | -0.42704    |
| T1            | 2.8905     | 428.94     | 0.0000 | HOMO-1                                       | → | LUMO   | 0.68486     |
|               |            |            |        | HOMO                                         | → | LUMO   | 0.12377     |
| T2            | 3.1009     | 399.84     | 0.0000 | HOMO-6                                       | → | LUMO   | -0.18157    |
|               |            |            |        | HOMO-3                                       | → | LUMO   | -0.20626    |
|               |            |            |        | HOMO-1                                       | → | LUMO   | -0.11079    |
|               |            |            |        | HOMO-1                                       | → | LUMO+3 | -0.12962    |
|               |            |            |        | HOMO                                         | → | LUMO   | 0.57176     |
|               |            |            |        | HOMO                                         | → | LUMO+2 | 0.12393     |
| T3            | 3.2273     | 384.18     | 0.0000 | HOMO-10                                      | → | LUMO+9 | 0.10999     |
|               |            |            |        | HOMO-8                                       | → | LUMO+1 | -0.11250    |

|    |        |        |        |        |   |        |          |
|----|--------|--------|--------|--------|---|--------|----------|
|    |        |        |        | HOMO-2 | → | LUMO   | -0.13406 |
|    |        |        |        | HOMO-2 | → | LUMO+1 | 0.58232  |
|    |        |        |        | HOMO   | → | LUMO+4 | 0.22921  |
| T4 | 3.3248 | 372.91 | 0.0000 | HOMO-5 | → | LUMO+5 | -0.13527 |
|    |        |        |        | HOMO-3 | → | LUMO   | 0.58397  |
|    |        |        |        | HOMO-3 | → | LUMO+6 | -0.12949 |
|    |        |        |        | HOMO-1 | → | LUMO+5 | -0.15246 |
|    |        |        |        | HOMO   | → | LUMO   | 0.24785  |
| T5 | 3.4027 | 364.37 | 0.0000 | HOMO-7 | → | LUMO+6 | -0.10309 |
|    |        |        |        | HOMO-6 | → | LUMO+3 | -0.11216 |
|    |        |        |        | HOMO-5 | → | LUMO   | 0.50374  |
|    |        |        |        | HOMO-5 | → | LUMO+2 | -0.11449 |
|    |        |        |        | HOMO-5 | → | LUMO+6 | -0.11610 |
|    |        |        |        | HOMO-3 | → | LUMO+5 | -0.25537 |
|    |        |        |        | HOMO-1 | → | LUMO+2 | 0.19735  |
|    |        |        |        | HOMO   | → | LUMO+6 | -0.17484 |

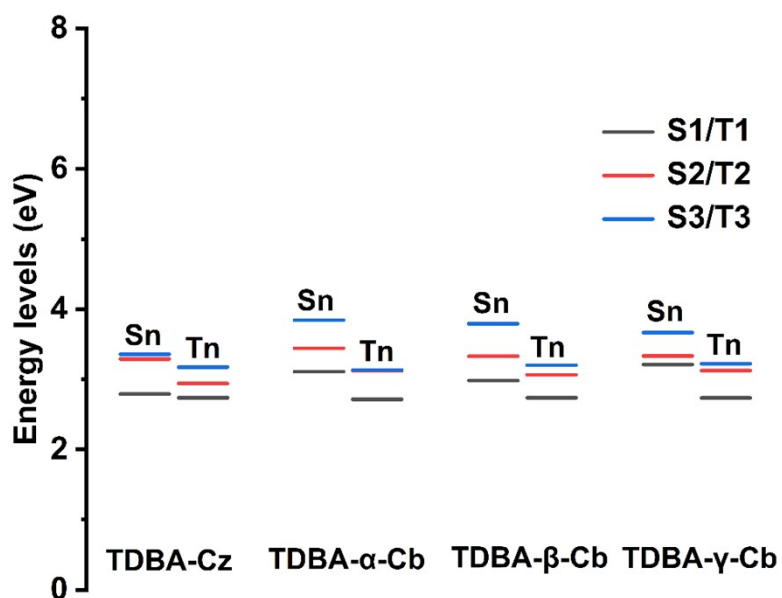

**Figure S3.** Energy levels of single and triple excited states of molecules are

calculated by TD-DFT.

**Table S6.** Energy levels of single and triple excited states of molecules.

| Energy levels                      | S1     | S2     | S3     | T1     | T2     | T3     |
|------------------------------------|--------|--------|--------|--------|--------|--------|
| <b>TDBA-Cz</b>                     | 2.7912 | 3.2906 | 3.3586 | 2.7368 | 2.9422 | 3.1747 |
| <b>TDBA-<math>\alpha</math>-Cb</b> | 3.1098 | 3.4411 | 3.8449 | 2.7156 | 3.1196 | 3.1336 |
| <b>TDBA-<math>\beta</math>-Cb</b>  | 2.9823 | 3.3311 | 3.7925 | 2.7387 | 3.0667 | 3.2021 |
| <b>TDBA-<math>\gamma</math>-Cb</b> | 3.2113 | 3.3327 | 3.6649 | 2.7361 | 3.1245 | 3.2231 |

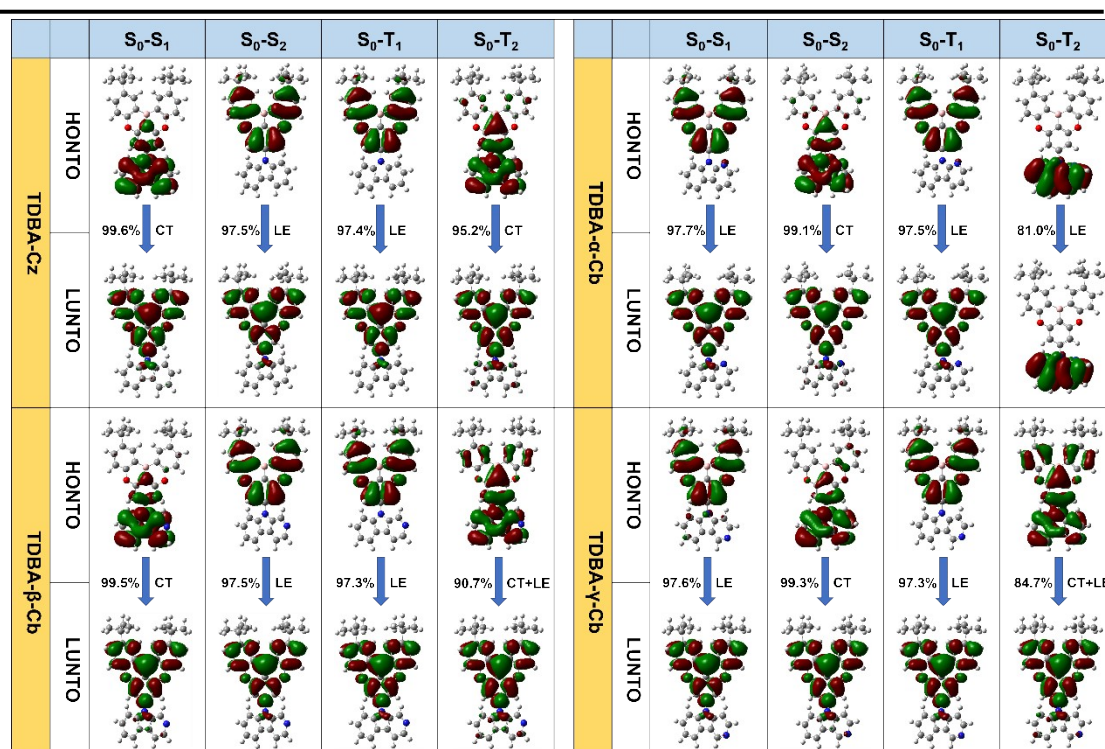

Figure S4. Highest occupied and lowest unoccupied NTOs (HONTOs and LUNTOs) of TDBA-Cz, TDBA- $\alpha$ -Cb, TDBA- $\beta$ -Cb and TDBA- $\gamma$ -Cb.

## 7. Photophysical Properties

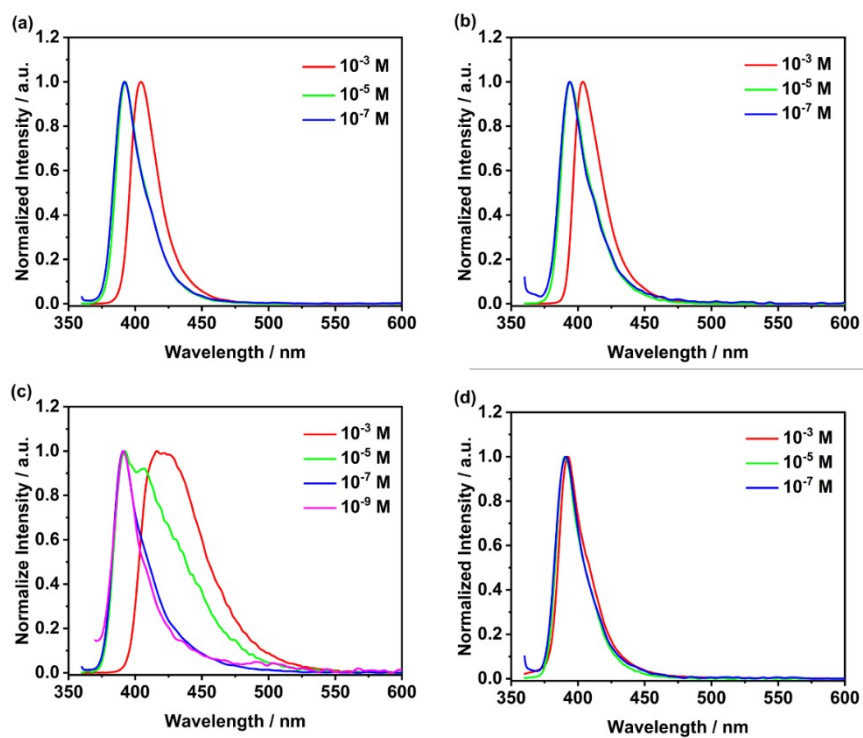

**Figure S5.** Fluorescence spectra of TDBA-Cz (a), TDBA- $\alpha$ -Cb (b), TDBA- $\beta$ -Cb (c), and TDBA- $\gamma$ -Cb (d) different concentrations in toluene.

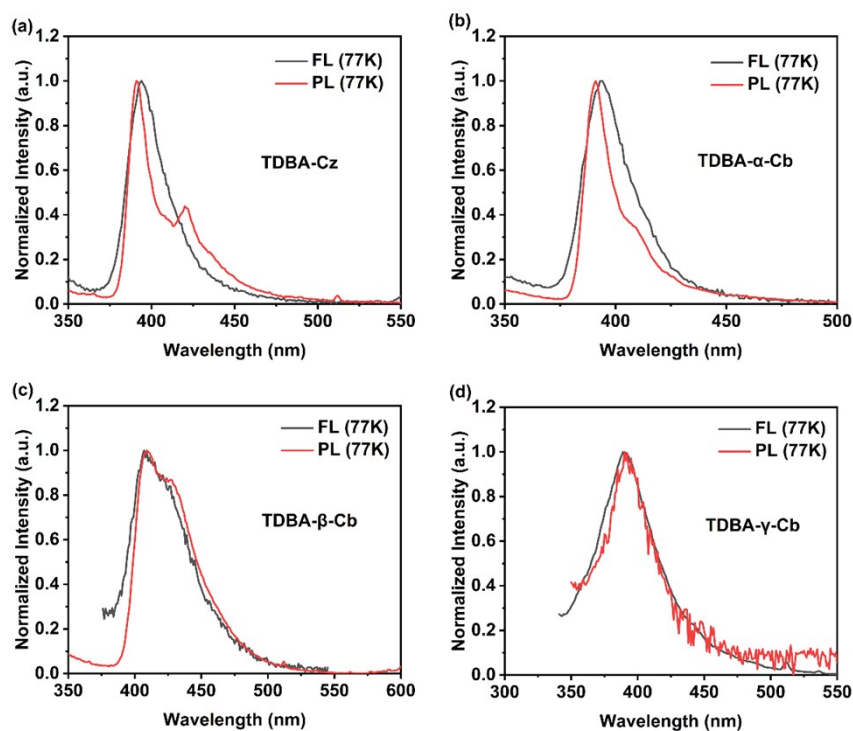

**Figure S6.** Fluorescence (77 K) and phosphorescence (77K) spectra of TDBA-Cz (a), TDBA- $\alpha$ -Cb (b), TDBA- $\beta$ -Cb (c) and TDBA- $\gamma$ -Cb (d).

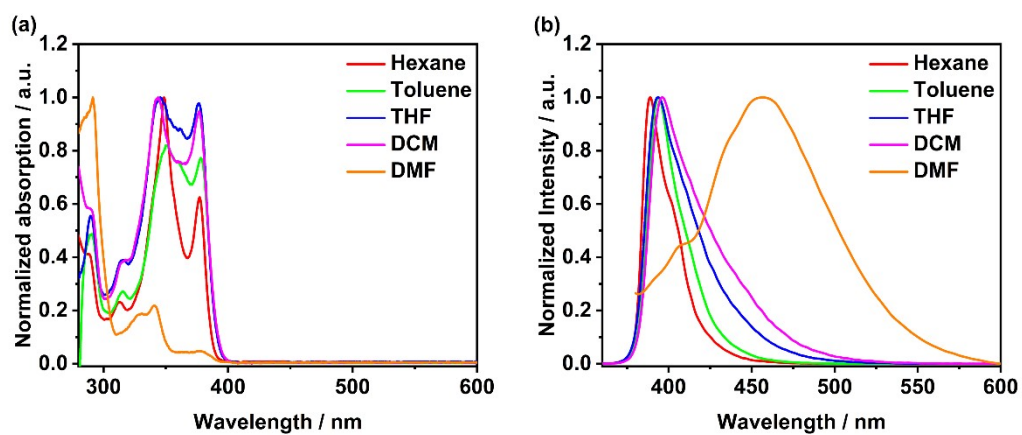

**Figure S7.** UV-vis absorption (a) and fluorescence spectra (b) of the compound TDBA-Cz were recorded in different solvents at  $\sim 10^{-5}$  M.

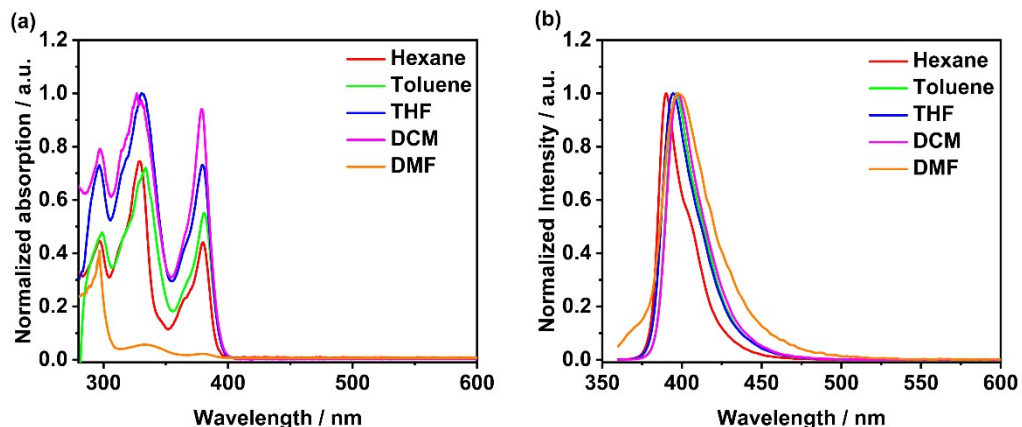

**Figure S8.** UV-vis absorption (a) and fluorescence spectra (b) of the compound TDBA- $\alpha$ -Cb were recorded in different solvents at  $\sim 10^{-5}$  M.

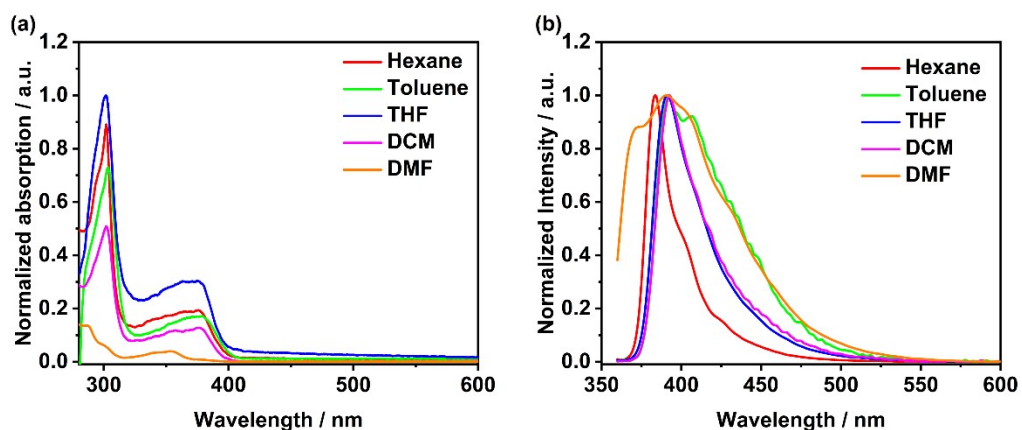

**Figure S9.** UV-vis absorption (a) and fluorescence spectra (b) of the compound TDBA- $\beta$ -Cb were recorded in different solvents at  $\sim 10^{-5}$  M.

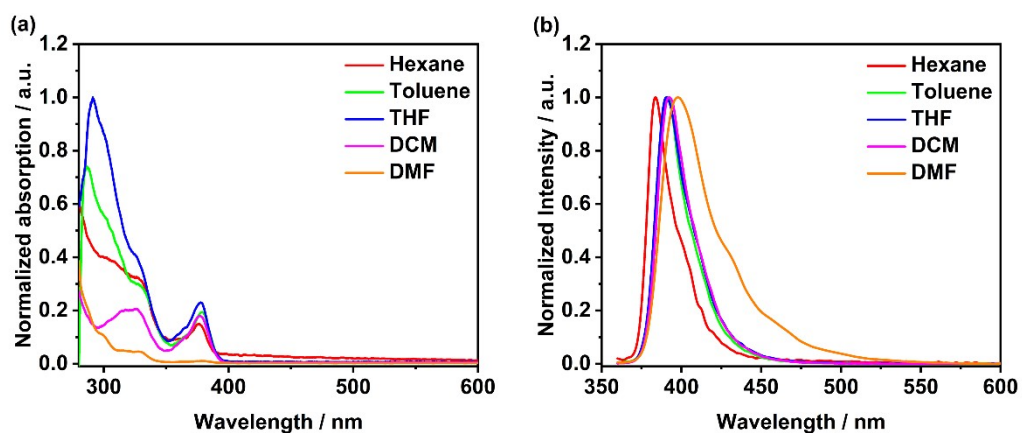

**Figure S10.** UV-vis absorption (a) and fluorescence spectra (b) of the compound TDBA- $\gamma$ -Cb were recorded in different solvents at  $\sim 10^{-5}$  M.



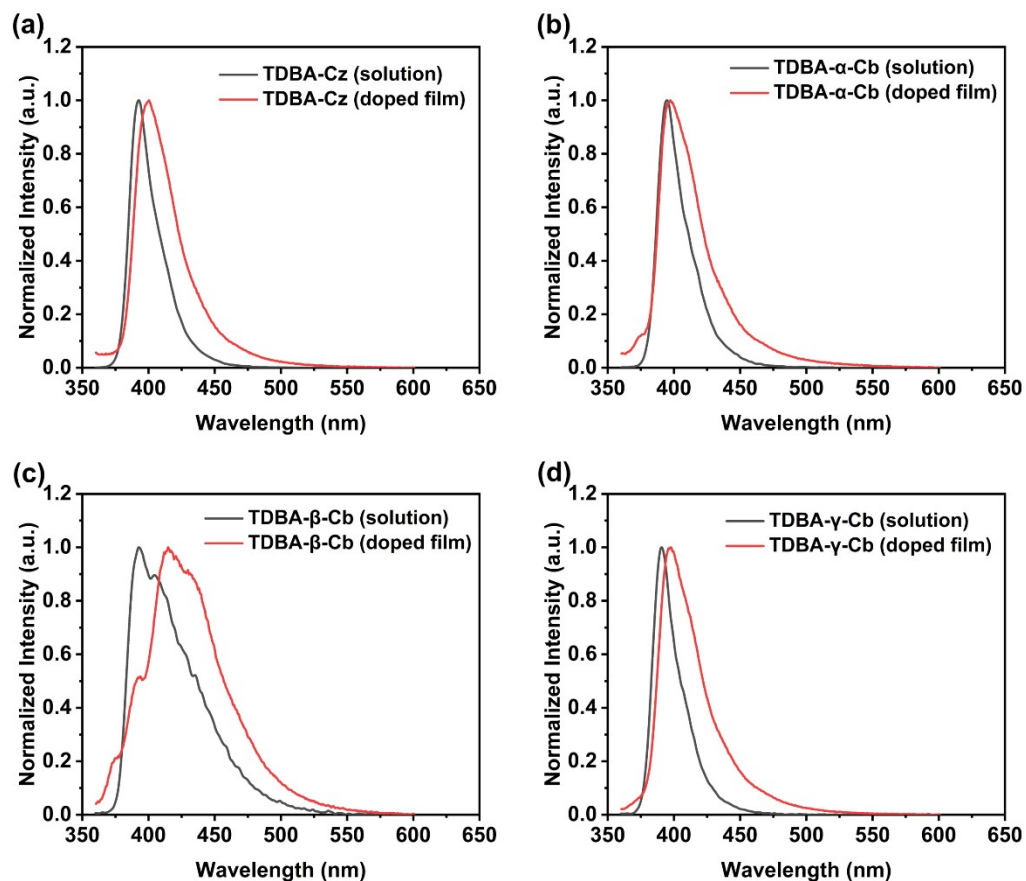

**Figure S11.** Normalized fluorescence spectra in dilute toluene solution (black) and CBP films with 3wt% doping concentration (red) of TDDBA-Cz (a), TDDBA- $\alpha$ -Cb (b), TDDBA- $\beta$ -Cb (c), and TDDBA- $\gamma$ -Cb (d).

**Table S7.** Emission peak and FWHM of TDDBA-Cz, TDDBA- $\alpha$ -Cb, TDDBA- $\beta$ -Cb and TDDBA- $\gamma$ -Cb in different solvents.

| Compounds |                    | TDDBA-Cz | TDDBA- $\alpha$ -Cb | TDDBA- $\beta$ -Cb | TDDBA- $\gamma$ -Cb |
|-----------|--------------------|----------|---------------------|--------------------|---------------------|
| Hexane    | $\lambda_{em}(nm)$ | 389      | 390                 | 383                | 384                 |
|           | FWHM(nm)           | 21       | 21                  | 22                 | 20                  |
| Toluene   | $\lambda_{em}(nm)$ | 394      | 396                 | 392/407            | 392                 |
|           | FWHM(nm)           | 24       | 26                  | 55                 | 23                  |
| THF       | $\lambda_{em}(nm)$ | 394      | 395                 | 391                | 391                 |
|           | FWHM(nm)           | 33       | 25                  | 34                 | 25                  |
| DCM       | $\lambda_{em}(nm)$ | 396      | 397                 | 392                | 392                 |

|     |                    |     |     |         |     |
|-----|--------------------|-----|-----|---------|-----|
|     | FWHM(nm)           | 38  | 26  | 35      | 25  |
| DMF | $\lambda_{em}(nm)$ | 456 | 397 | 372/391 | 398 |
|     | FWHM(nm)           | 84  | 34  | 75      | 36  |

## 8. Transient PL decay

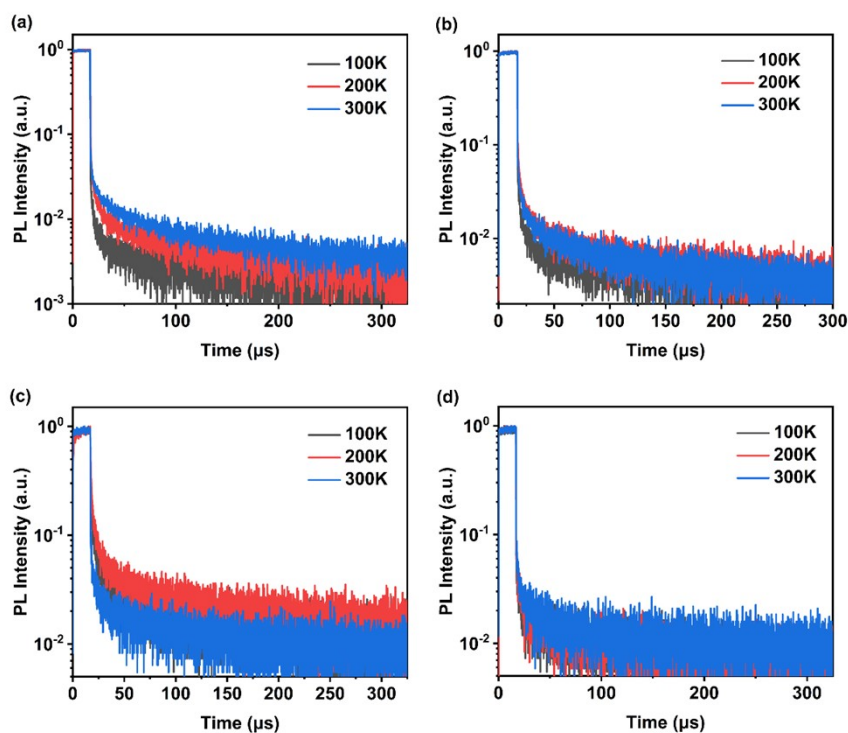

**Figure S12.** The transient PL decay spectra of **TDBA-Cz** (a), **TDBA- $\alpha$ -Cb** (b), **TDBA- $\beta$ -Cb** (c), and **TDBA- $\gamma$ -Cb** (d) in toluene at various temperatures.

## 9. Electrochemical properties

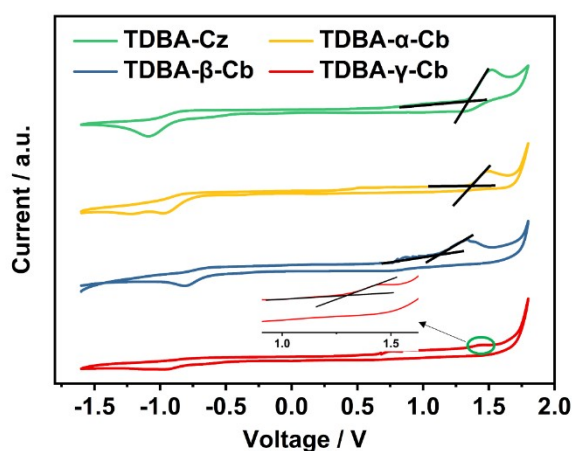

**Figure S13.** Cyclic voltammetry (CV) measurements of **TDBA-Cz**, **TDBA- $\alpha$ -Cb**, **TDBA- $\beta$ -Cb**, and **TDBA- $\gamma$ -Cb**.

## 10. Device performance

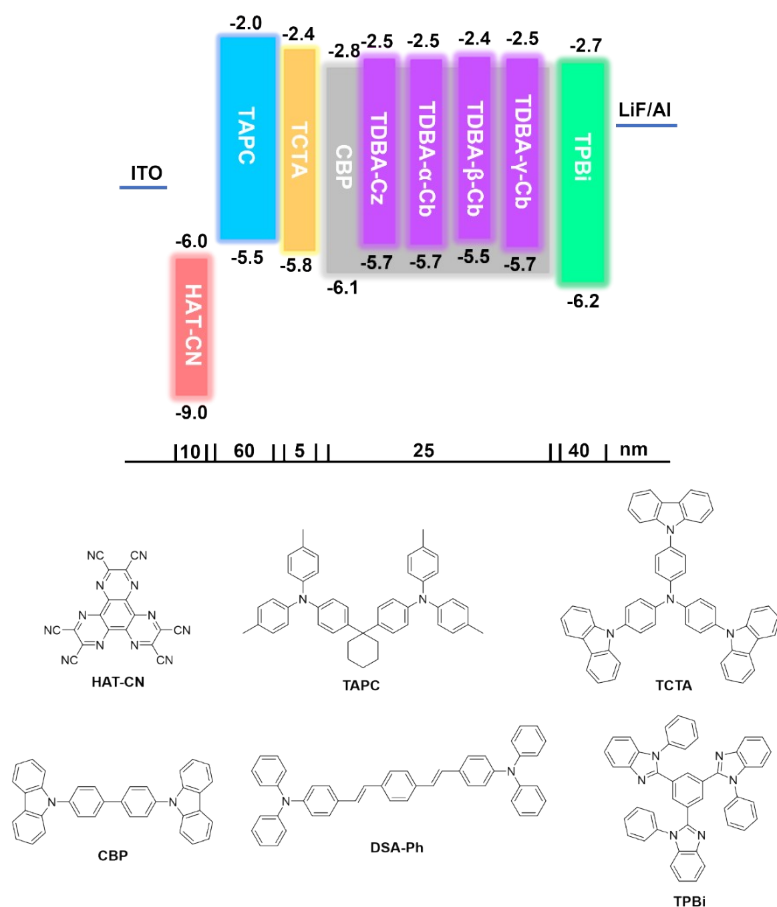

**Figure S14.** Device structure, energy levels, and molecular structures used in these devices.

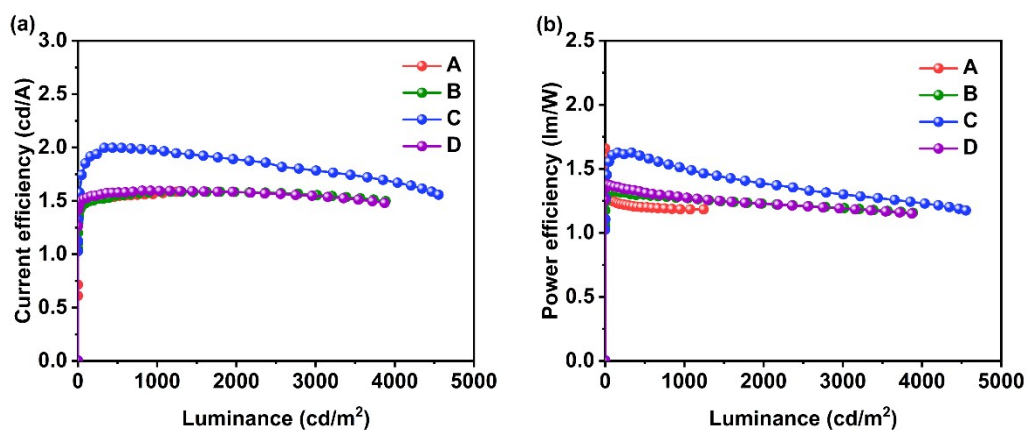

**Figure S15.** (a) Current Efficiency versus luminance curves, (b) Power Efficiencies versus luminance curves of Device A-D based CBP doped devices.

## 11. NMR spectra and Mass Spectra

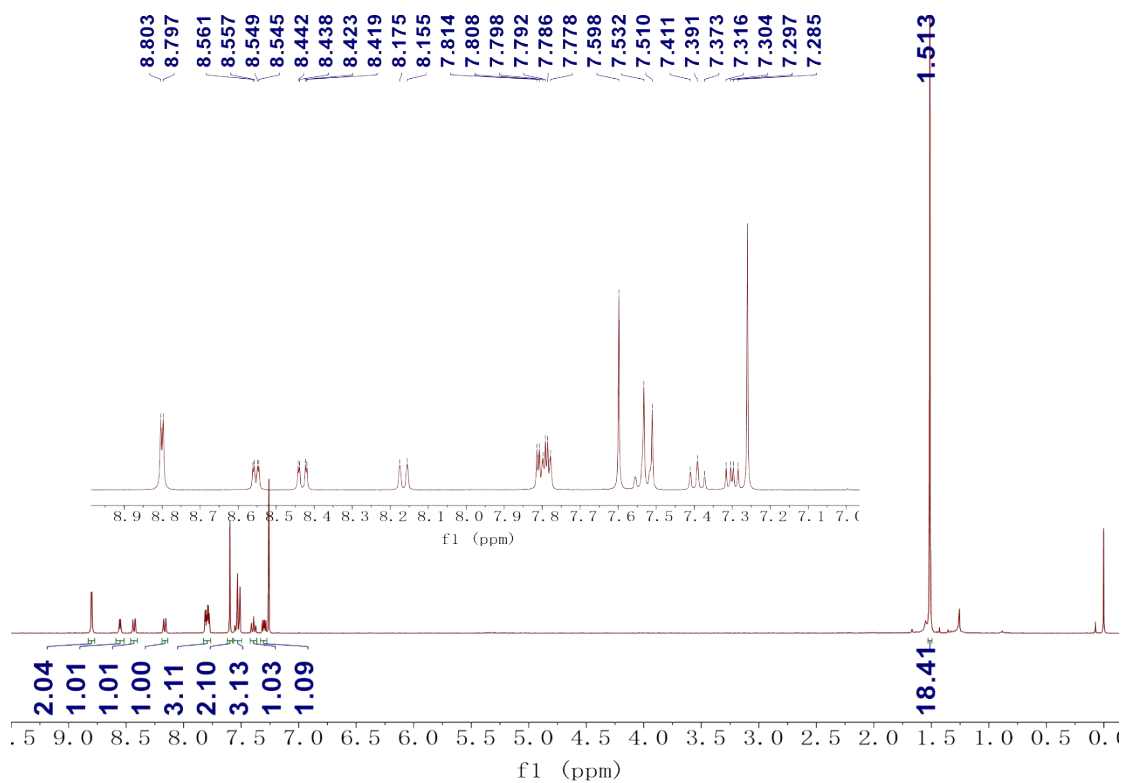

**Figure S16.**  $^1\text{H}$  NMR spectrum of **TDBA- $\alpha$ -Cb** (400 MHz,  $\text{CDCl}_3$ , *r.t.*).

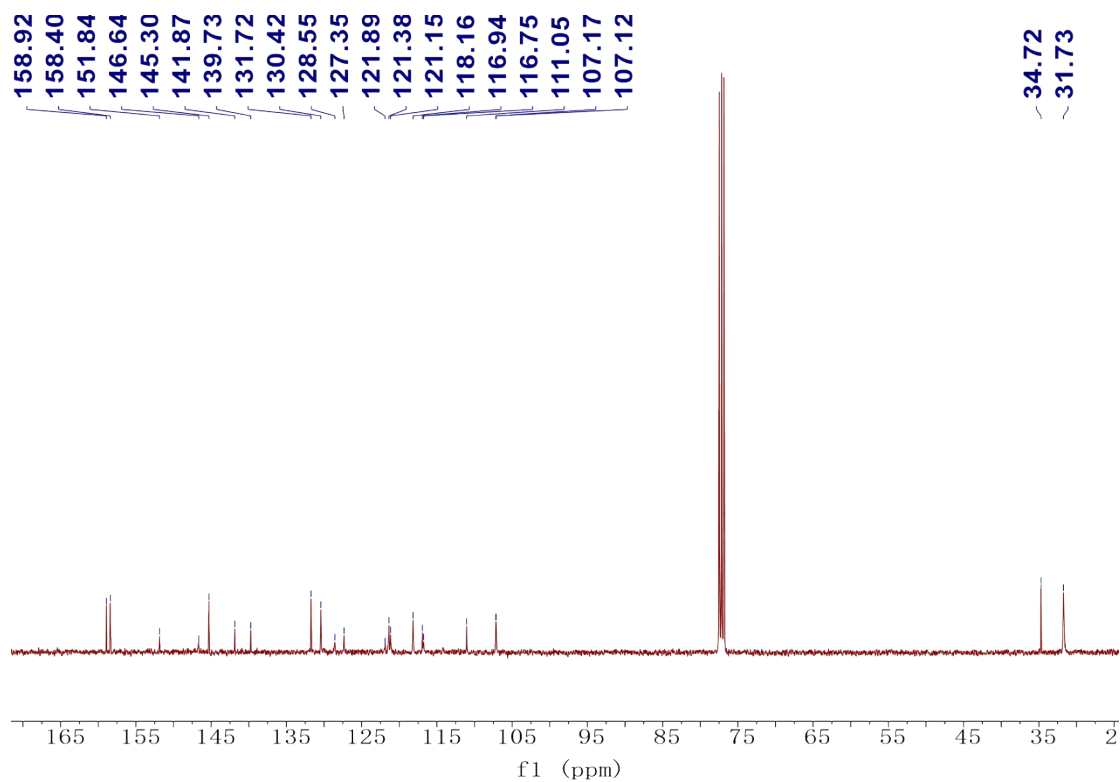

**Figure S17.**  $^{13}\text{C}$  NMR spectrum of **TDBA- $\alpha$ -Cb** (400 MHz,  $\text{CDCl}_3$ , *r.t.*).

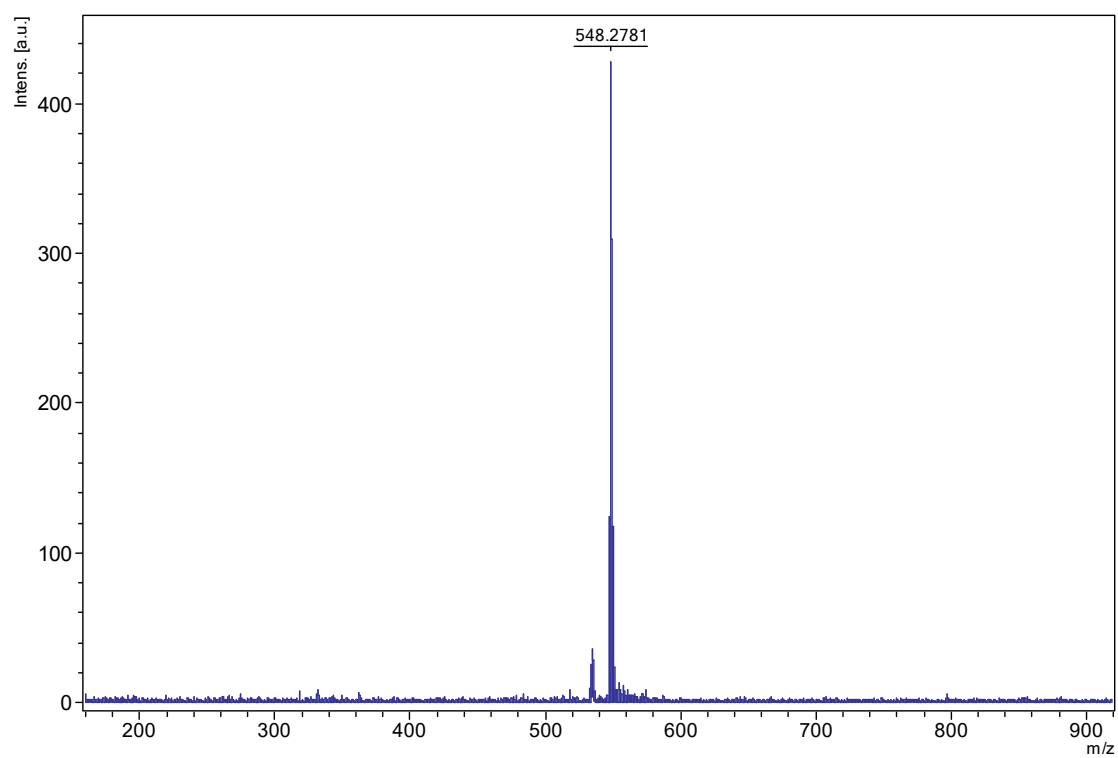

**Figure S18.** Mass spectra of TDBA- $\alpha$ -Cb.

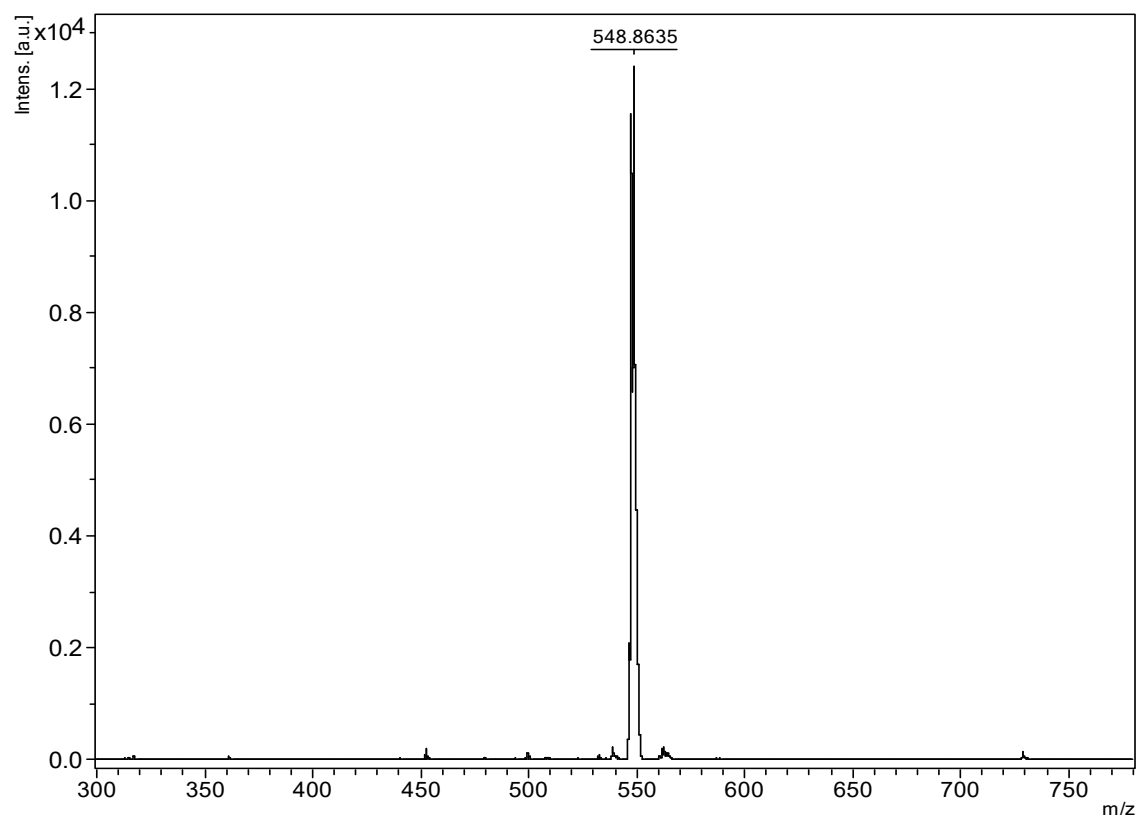

**Figure S19.** Mass spectra of TDBA- $\beta$ -Cb.

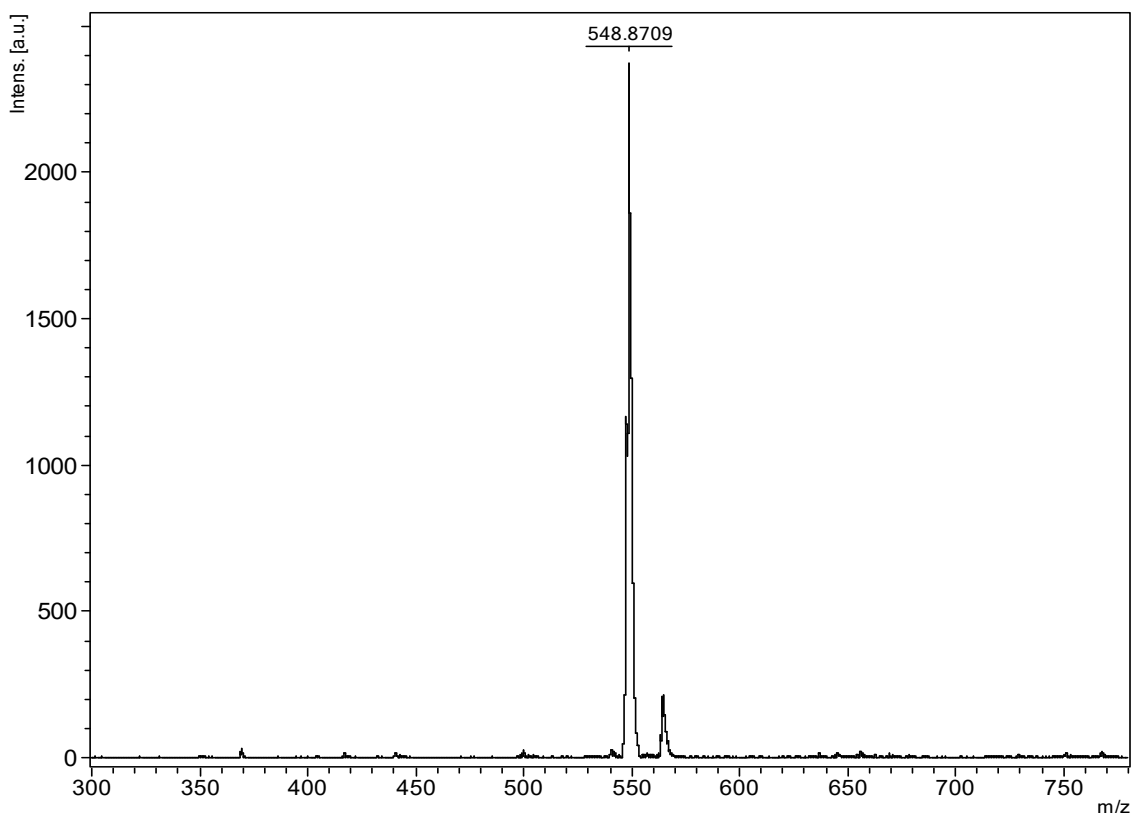

**Figure S20.** Mass spectra of TDBA- $\gamma$ -Cb.

## 12. References

- S1 M. J. Frisch, G. W. Trucks, H. B. Schlegel, G. E. Scuseria, M. A. Robb, J. R. Cheeseman, G. Scalmani, V. Barone, G. A. Petersson, H. Nakatsuji, X. Li, M. Caricato, A. V. Marenich, J. Bloino, B. G. Janesko, R. Gomperts, B. Mennucci, H. P. Hratchian, J. V. Ortiz, A. F. Izmaylov, J. L. Sonnenberg, D. Williams-Young, F. Ding, F. Lipparini, F. Egidi, J. Goings, B. Peng, A. Petrone, T. Henderson, D. Ranasinghe, V. G. Zakrzewski, J. Gao, N. Rega, G. Zheng, W. Liang, M. Hada, M. Ehara, K. Toyota, R. Fukuda, J. Hasegawa, M. Ishida, T. Nakajima, Y. Honda, O. Kitao, H. Nakai, T. Vreven, K. Throssell, J. A. Montgomery, Jr., J. E. Peralta, F. Ogliaro, M. J. Bearpark, J. J. Heyd, E. N. Brothers, K. N. Kudin, V. N. Staroverov, T. A. Keith, R. Kobayashi, J. Normand, K. Raghavachari, A. P. Rendell, J. C. Burant, S. S. Iyengar, J. Tomasi, M. Cossi, J. M. Millam, M. Klene, C. Adamo, R. Cammi, J. W. Ochterski, R. L. Martin, K. Morokuma, O. Farkas, J. B. Foresman, and D. J. Fox, Gaussian 16, revision A.03. Wallingford CT: Gaussian, Inc.; 2016.
- S2 J. Ochi, Y. Yamasaki, K. Tanaka, Y. Kondo, K. Isayama, S. Oda, M. Kondo, T.

- Hatakeyama, *Nat. Commun.*, 2024, **15**, 2361.
- S3 L. Chen, Y. Jiang, H. Nie, R. Hu, H. S. Kwok, F. Huang, A. Qin, Z. Zhao, B. Z. Tang, *ACS Appl. Mater. Interfaces*, 2014, **6**, 17215-17225.
- S4 W. Qin, Z. Yang, Y. Jiang, J. W. Y. Lam, G. Liang, H. S. Kwok, B. Z. Tang, *Chem. Mater.*, 2015, **27**, 3892-3901.
- S5 D. H. Ahn, S. W. Kim, H. Lee, I. J. Ko, D. Karthik, J. Y. Lee, J. H. Kwon, *Nat. Photonics.*, 2019, **13**, 540-546.
- S6 J. F. Joung, M. Han, J. Hwang, M. Jeong, D. H. Choi, S. Park, *JACS Au.*, 2021, **1**, 427-438.
